# Supplementary material
Source: publisher site journal article supplement (https://www.dovepress.com/article/387258)
Supplement: Supplementary file 1 [file get_supplementary_file.php]

**Supplementary_Material 1***.* The primer information

| **gene** | **Sequence** |
| --- | --- |
| linc00304 | FORWARD: CCCAATCAGGAGGGAATGGT |
| REVERSE: GCTCAACGCACAATCATCCT |
|  |  |
| linc00926 | FORWARD: CAGCATCCACGTTGTATCCC |
| REVERSE: AGCTCGAGACCGTAAACACT |
|  |  |
| MIAT | FORWARD: GGGAAACAGGGAGTGAGTGA |
| REVERSE: CCAGAACTCCCTGCTGAAGA |
|  |  |
| β-actin | FORWARD: CCTGGCACCCAGCACAAT |
| REVERSE: GGCCGGACTCGTCATAC |

**Supplementary Material 2.**

**Baseline clinical characteristics of 24 AS patients involved in this study**

| **Indicators** | | **AS patients** |
| --- | --- | --- |
| N | | 24 |
| Age(years) | | 34.75±9.72 |
| Male/female | | 12/12 |
| [Dactylitis](javascript:;) | | 0 |
| [Psoriasis](javascript:;) | | 0 |
| [Enteritis](javascript:;) | | 1 |
| [Uveitis](javascript:;) | | 0 |
| Pillow distance from the wall | | 2.12±4.08 |
| Hand distance from the ground | | 19.31±17.72 |
| Chest mobility | | 3.65±1.07 |
| Schober test | | 5.34±2.50 |
| Bone marrow edema with/without | | 19/5 |
| ESR(mm/h) | | 16.31±15.62( |
| CRP(mg/l) | | 16.15±24.48 |
| ASDAScrp | | 2.67±0.77 |
| mSASSS | | 12.0±2.25 |
| Spondyloarthritis research consortium of canada | | 15.6±18.90 |
| Maastricht ankylosing spondylitis enthesis score | | 1.5±0.511 |
| X-ray stage | 2 | 6 |
| 3 | 16 |
| 4 | 2 |
